1 **Title:** The upper respiratory tract microbiome of Australian Aboriginal and Torres Strait  
2 Islander children in ear and nose health and disease.

3

4 **Running Title:** Indigenous otitis media and the microbiome

5

6

7 Andrea Coleman<sup>1,2</sup>, Julian Zaugg<sup>3</sup>, Amanda Wood<sup>4</sup>, Kyra Cottrell<sup>1</sup>, Eva Grahn Håkansson<sup>5</sup>,  
8 Jasmyn Adams<sup>4</sup>, Matthew Brown<sup>4</sup>, Anders Cervin<sup>1,6</sup>, Seweryn Bialasiewicz<sup>3,7#</sup>.

9

- 10 1. The University of Queensland Centre for Clinical Research; Herston (4001), Australia  
11 2. Townsville University Hospital, Townsville (4814), Australia  
12 3. Australian Centre for Ecogenomics, The University of Queensland, St Lucia (4067),  
13 Australia  
14 4. Queensland Health Deadly Ears Program, Brisbane (4001), Australia  
15 5. Clinical Microbiology, Umeå University, Umeå (901 87), Sweden  
16 6. The Royal Brisbane and Women's Hospital, Brisbane (4001), Australia  
17 7. Queensland Paediatric Infectious Diseases Laboratory, Queensland Children's  
18 Hospital, South Brisbane (4001), Australia

19

20 Corresponding authors:

21 Dr Seweryn Bialasiewicz

22 [seweryn@uq.edu.au](mailto:seweryn@uq.edu.au)

23 Dr Andrea Coleman

24 [a.coleman2@uq.edu.au](mailto:a.coleman2@uq.edu.au)

25

26 **Abstract**

27 **Objective:** To examine the nasal microbiota in relation to otitis status and nose health in  
28 Indigenous Australian children.

29 **Methods:** Children aged 2-7 years were recruited from two northern Australian (Queensland)  
30 communities. Clinical histories were obtained through parent interview and review of the  
31 medical record. Nasal cavity swabs were obtained, and the child's ears, nose and throat were  
32 examined. DNA was extracted and analysed by 16S rRNA amplicon next generation  
33 sequencing of the V3/V4 region in combination with previously generated culture data.

34 **Results:** 103 children were recruited (mean 4.7 years), 17 (16.8%) were 'healthy', i.e. normal  
35 examination and no history of otitis media (OM). Nasal microbiota differed significantly in  
36 relation to otitis status and nose health. Children with historical OM had higher relative  
37 abundance of *Moraxella* compared to healthy children, despite both having healthy ears at the  
38 time of swabbing. Children with healthy noses had higher relative abundance of *S. aureus*  
39 compared to those with rhinorrhoea. *Dolosigranulum* was correlated to *Corynebacterium* in  
40 healthy children. *Haemophilus* and *Streptococcus* correlated across phenotypes.

41 *Ornithobacterium* was absent/low relative abundance in healthy children and clustered  
42 around otopathogens. It correlated with *Helcococcus* and *Dichelobacter*.

43 **Conclusions:** *Dolosigranulum* and *Corynebacterium* form a synergism that promotes  
44 URT/ear health in Indigenous Australian children. *Ornithobacterium* likely represents  
45 *Candidatus Ornithobacterium hominis* and in this population is correlated with a novel  
46 bacterium which appears to be related to poor upper respiratory tract/ear health.

47

## 48 Importance

49 Recurring and chronic infections of the ear (otitis media) are disproportionately prevalent in  
50 disadvantaged communities across the globe, and in particular, within Indigenous  
51 communities. Despite numerous intervention strategies, otitis media persists as a major health  
52 issue and is the leading cause of preventable hearing loss. In disadvantaged communities, this  
53 hearing loss is associated with negative educational and social development outcomes, and  
54 consequently, poorer employment prospects and increased contact with the justice system in  
55 adulthood. Thus, a better understanding of the microbial ecology is needed in order to  
56 identify new targets to treat, as well as prevent the infections. This study used a powerful  
57 combination of 16S rRNA sequencing and extended culturomics to show that  
58 *Dolosigranulum pigrum*, a bacterium previously identified as a candidate protective species,  
59 may require co-colonisation with *Corynebacterium pseudodiphtheriticum* in order to prevent  
60 otitis media. Additionally, emerging and potentially novel pathogens and bacteria were  
61 identified.

62

63

64

## 65 Introduction

66 Otitis media (OM), an inflammation/infection of the middle ear, is a common paediatric  
67 condition[1]. However, in many indigenous populations globally there is a disproportionately  
68 high OM-associated burden, impacting negatively on schooling and employment outcomes[1,  
69 2]. Previous microbiological studies relating to OM in indigenous populations have been  
70 largely limited to the main otopathogens (*Streptococcus pneumoniae*, *Haemophilus*  
71 *influenzae*, and *Moraxella catarrhalis*) using culture-dependent methods and seldom included  
72 healthy indigenous control children[3]. One study used 16S ribosomal RNA (rRNA) next

73 generation sequencing (NGS) to explore the middle ear effusion and nasopharyngeal/adenoid  
74 microbiota in relation to OM with effusion (OME) in 11 Aboriginal and/or Torres Strait  
75 Islander (referred to herein as Indigenous Australian) children[4], which confirmed the  
76 association of otopathogen-containing genera and OME.

77

78 We have previously used culturomics and species-specific quantitative PCR (qPCR) to  
79 explore the nasal microbiota in relation to ear health and OM in 103 Indigenous Australian  
80 children[5]. We found that children with historical or current OM/upper respiratory tract  
81 (URT) infection (URTI) had high otopathogen loads and higher detection of rhinovirus[5]. In  
82 contrast, *Corynebacterium pseudodiphtheriticum* and *Dolosigranulum pigrum* were  
83 associated with URT/ear health[5]. However, culture-based analyses can be insensitive to  
84 microbial population structure and fastidious or unculturable organisms, such as the recently  
85 described, *Candidatus Ornithobacterium hominis*[6, 7]. To address this limitation, 16S rRNA  
86 NGS, supplemented with the existing culturomics data, was used to investigate the broader  
87 bacterial microbiome and how it relates to ear and nose health and disease in Indigenous  
88 Australian children.

89

## 90 **Materials and Methods**

91 Additional detail of the materials and methods can be found in the supplementary material.

92

### 93 **Population and sample collection**

94 Indigenous Australian children aged 2–7 years old were recruited prospectively from one  
95 rural and one remote northern Queensland communities in Australia through October 2015–  
96 November 2017. Children whom received antibiotics within three weeks of sample collection

97 were excluded[5]. The study was approved by the Far North Queensland Human Research  
98 Ethics Committee (HREC/15/QCH/10-594).

99

100 A detailed description of the cohort, sampling and clinical data collection has been previously  
101 documented[5]. Briefly, demographic details and ear health history were collected for eligible  
102 children from parent interview and the child's medical record. Children underwent ear  
103 (otoscopy), nose and throat (ENT) examination. Ear status at time of swabbing was classified  
104 according to the most affected ear. Intra-nasal mucosal swabs (dry FLOQSwabs, Copan  
105 Diagnostics, USA) used for molecular analysis were collected in parallel with Rayon swab  
106 (Transystem<sup>TM</sup> Minitip, Copan Diagnostics, USA) for culturomics[5]. All swabs were kept at  
107 4°C from time of collection until arrival at the laboratory 24–48 hours later. Molecular swabs  
108 were then stored at -80°C.

109

#### 110 DNA extraction and quality assurance

111 DNA was extracted via mechanical bead beating and tissue lysis, followed by automated  
112 MagNa Pure (Roche Diagnostics, Australia), as previously described[5]. Four clean negative  
113 control swabs were processed in parallel with the sample swabs. The quality of nasal  
114 sampling was assessed using a real-time PCR targeting the endogenous retrovirus-3 (ERV3)  
115 marker for human DNA[8]. Swabs that amplified with cycle thresholds  $\leq 38$  were considered  
116 to have adequate nasal epithelial cell content, and by extension, be of good collection quality.  
117 Swabs producing cycle thresholds  $>38$  were excluded from further analysis.

118

#### 119 *16S Sequencing*

120 All sample and negative control DNA extracts underwent 16S rRNA gene amplification  
121 using the 341F;806R primer set, followed by secondary indexing PCR. The equimolar library

122 pool was then sequenced on an Illumina MiSeq (San Diego, CA, USA) with a V3, 600 cycle  
123 kit (2 x 300 base pairs paired-end).

124

### 125 *Sequence data processing*

126 Primer sequences were removed from de-multiplexed reads using cutadapt (ver. 2.6). Using  
127 QIIME2 (ver. 2019.10.0), reads were filtered, dereplicated and chimeras removed by  
128 DADA2. Taxonomy was assigned to the resulting amplicon sequence variants (ASV) by  
129 aligning each (classify-consensus-blast) against the non-redundant SILVA database (release  
130 138).

131

### 132 *Data availability*

133 Amplicon sequencing data has been deposited in NCBI's Short Read Archive under BioProject  
134 number PRJNA684919 (<https://www.ncbi.nlm.nih.gov/sra/PRJNA684919>) with accession numbers  
135 SRR13264782-SRR13264885.

136

### 137 *Data analysis and statistics*

138 Amplicon data analyses were performed in R (ver. 4.0.2). ASVs that were not bacterial,  
139 fungal or archaeal in origin, classified at below the phylum level, or that were classified as  
140 chloroplast or mitochondria, were discarded. Putative contaminants were identified using  
141 decontam (ver. 1.8.0) and microdecon (ver. 1.0.2) and removed. ASVs with a relative  
142 abundance <0.05% were also removed, with those samples with less than 4,000 reads  
143 remaining then discarded. Sample depth was limited to a maximum of 50,000 reads by using  
144 the rrarefy function in vegan (ver. 2.5-6).

145 Vegan was used to perform principal-component analysis (PCA), permutational multivariate  
146 analysis of variance (PERMANOVA) and analysis of multivariate homogeneity

147 (PERMDISP) on centred log-ratio (clr) transformed ASV counts collapsed to the genus level.  
148 Differentially abundant ASVs and genera were identified using DESeq2 (ver. 1.28.1). Alpha  
149 diversity metrics Chao1, Shannon, and Simpson were calculated using phyloseq (ver. 1.32.0)  
150 on samples rarefied to 10,000 reads. Significant differences in alpha diversity distributions  
151 were determined through either Mann-Whitney U tests or Kruskal-Wallis and Dunn's  
152 multiple comparisons tests, corrected for multiple testing using the Benjamini and Hochberg  
153 method. FastSpar (ver. 0.0.10) was used for correlation analysis of genera.

#### 154 **Culturomic analysis**

155 Culture-based swabs were processed using an expanded agar protocol under aerobic and  
156 anaerobic conditions with Vitek MS MALDI-TOF (bioMérieux) isolate identification as  
157 previously described[5]. Agreement between culture and 16S sequencing was assessed using  
158 Cohen's Kappa.

159

#### 160 **Results**

161 In total, 103 children were recruited; two children refused swabbing, resulting in 101 swabs  
162 for analysis. All swabs met quality assurance criteria on ERV3 testing. Raw sample 16S read  
163 depth ranged from 149–262,880 (median 119,693), with quality, contamination and non-  
164 specific filtering resulting in the remaining read depth ranging from 0–163,794 (median  
165 66,929). Fourteen samples were subsequently excluded as they did not pass quality control.  
166 The agreement between culturomics and 16S sequencing was 59.2%, Cohen's kappa 0.08.  
167 The low level of agreement was predominately due to high sensitivity of detection by 16S  
168 sequencing, detecting on average of 14.3 (range 1–73) more genera per sample compared to  
169 culture.

170

171 Nasal Microbiota in relation to ear health

172 Only 17 children (16.8%) had no history of OM and normal ENT examinations at the time of  
173 swabbing (Never OM), 7 (6.9%) had a perforated TM, 18 (17.8%) had a middle ear effusion  
174 (Effusion), 4 (4.0%) had AOM, and 55 had a past history of OM, but normal TM at the time  
175 of swabbing (HxOM) (54.5%) (Table 1). Due to low numbers, AOM samples were excluded  
176 from further analyses. There was a significant difference in the nasal microbiota in relation to  
177 otitis status (PERMANOVA  $F = 2.101$ ,  $p = 0.0027$ ), although with dispersion differences  
178 (PERMDISP  $F = 3.341$ ,  $p = 0.0244$ ). Within children that had healthy TMs at the time of  
179 sampling, HxOM had higher mean abundance of *Moraxella* compared to Never OM (31.22%  
180 vs 20.22%,  $p < 0.05$ ) (Figure 1, Supplementary Table 1). The relative abundance of nine  
181 *Dolosigranulum* ASVs differed significantly in relation to otitis status; ASVs 588 and 2067  
182 were more abundant in children with normal TMs, while ASVs including 1030, 1069 and  
183 1528 were more abundant in children with OM (Supplementary Table 2) The relative  
184 abundance of *Dolosigranulum* was positively correlated with *Corynebacterium* in Never OM  
185 and both *Corynebacterium* and *Moraxella* in HxOM; there was no significant correlation  
186 between *Dolosigranulum* and the other main otopathogen-containing genera (Supplementary  
187 Figure 1). Children with Effusion had higher mean relative abundance of *Ornithobacterium*  
188 (34.1%) compared to Never OM (28.4%); although non-significant according to DESeq, was  
189 significant according to Dunn's test (adjusted  $p = 0.018$ , KrusW  $p = 0.021$ ) (Supplementary  
190 Figure 2).

191

192 Network analyses showed taxa correlations largely differed according to otitis status, with the  
193 notable exception of *Streptococcus* and *Haemophilus*, which correlated across all groups.  
194 Never OM children had a more complex network of correlated genera, compared to HxOM,  
195 despite both groups having normal TMs at the time of swabbing (Figure 2). *Dolosigranulum*



196 positively correlated with different genera across all otitis phenotypes, with exception of  
197 Effusion; to *Corynebacterium* in the Never OM group and to *Moraxella* and *Neisseriaceae* in  
198 the HxOM and TM perforation groups, respectively (Figure 2). Our culturomic data  
199 suggested the species representing the associated genera were *D. pigrum* and *C.*  
200 *pseudodiphtheriticum*[5]. *Ornithobacterium* correlated with *Helcococcus*, *Dichelobacter*  
201 (Figure 2). There were no significant differences in alpha diversity in relation to otitis status  
202 (Supplementary Table 3).

203

#### 204 Nasal microbiota in relation to nose health

205 The nasal microbiota was significantly related to nose health (PERMANOVA  $p < 0.001$ ,  $F =$   
206  $2.98$ , PERMDISP  $F = 2.753$ ,  $p = 0.068$ ). Compared to purulent rhinorrhoea, children with  
207 healthy noses had significantly higher mean relative abundance of *Staphylococcus* (6.68% vs  
208 0.004%) and *Neisseriaceae* (0.868% vs 0.096%)(all  $p < 0.001$ ) (Figure 1, Supplementary  
209 Table 2). ASV analysis showed *Staphylococcus aureus* is likely accounting for the  
210 *Staphylococcus* detections. Similar to ear health, multiple *Dolosigranulum* ASVs were  
211 detected across nose phenotypes (Supplementary Table 2). Network complexity and  
212 correlation patterns between *Dolosigranulum* and other bacteria in relation to nose status  
213 were similar to those seen within otitis status (Figure 3). *Staphylococcus* correlated  
214 negatively with *Moraxella* in healthy noses, however *Ornithobacterium* was present in all  
215 phenotypes and correlated to *Helcococcus* and *Dichelobacter* and *Cardiobacteriaceae*  
216 (Figure 3). There were no significant differences in alpha diversity in relation to nose health  
217 (Supplementary Table 3).

218

## 219 Nasal microbiota in relation to season, household occupancy and community

220 No relationship was found between nasal microbiota and season (PERMANOVA  $p = 0.456$ ,  
221  $F = 1.00$ ; PERMDISP,  $p = 0.192$ ,  $F = 1.619$ ) or household occupancy (PERMANOVA  $p =$   
222  $0.748$ ,  $F = 0.791$ ; PERMDISP  $p = 0.844$ ,  $F = 0.181$ ). There were no significant differences in  
223 relative abundance or alpha diversity for these variables (Figure 1, Supplementary Table 3).  
224 The nasal microbiota differed significantly in relation to community of residence  
225 (PERMANOVA  $p < 0.001$ ,  $F = 3.71$ ), although with dispersion differences (PERMDISP,  $F =$   
226  $7.87$ ,  $p = 0.005$ ). No separation was observed between the two communities on PCA (Figure  
227 4).

228

## 229 Discussion

230 We demonstrated the nasal microbiota of Indigenous Australian children was related to ear  
231 and nose health. Healthy children with no history of OM showed a relationship between  
232 *Dolosigranulum* and *Corynebacterium*. We detected *Ornithobacterium* in children with OM,  
233 suggesting a potential role as a novel otopathogen in this population.

234

235 In relation to otitis status, *Moraxella* had a higher relative abundance in children with a  
236 history of OM, compared to children with no history of OM, despite both groups having  
237 healthy ears at the time of swabbing. In children with healthy noses, there was a negative  
238 correlation between *Moraxella* and *Staphylococcus*. *Moraxella* are common nasal colonisers  
239 whose abundance can increase during acute respiratory infections, leading to prolonged  
240 periods of enrichment within the nasal microbiota [9, 10]. Thus, the observed increase of  
241 *Moraxella* in HxOM children may be a downstream persistent effect of past respiratory  
242 infections (e.g. OM) leading to a remodelled microbiome distinct from children who did not  
243 contract OM. *In vitro* studies demonstrate some *Staphylococcus* species can inhibit the

244 growth of *M. catarrhalis*[11] and may account for their negative correlation within healthy  
245 noses in our cohort.

246

247 A combination of 16S NGS and culturomic data strongly suggested there exist correlations  
248 between *C. pseudodiphtheriticum* and *D. pigrum* in healthy children with no rhinorrhoea and  
249 no historical OM. In non-Indigenous infants, *Corynebacterium* and *Dolosigranulum* are well-  
250 recognised as being associated with a stable nasopharyngeal microbiota, conferring URT and  
251 ear health[10, 12-15]. *In vitro* studies of *Corynebacterium*–*Dolosigranulum* relationships  
252 demonstrated complex interactions that were species-specific, which may be dependent on  
253 use host resources[16]. However, for the inhibition of *S. pneumoniae* both *C.*  
254 *pseudodiphtheriticum* and *D. pigrum* were required; neither species could inhibit the growth  
255 of *S. pneumoniae* alone[16]. These *in vitro* findings corroborate our *in vivo* data and warrant  
256 further investigation, particularly with the view towards prevention/control of otopathogen  
257 colonisation in the nose and consequent ear health benefits.

258

259 *Dolosigranulum* was ubiquitous in the nasal microbiota of our population, however  
260 examination at the level of ASV suggests this may be a heterogeneous group. The method of  
261 ASV analysis has greater precision than operational taxonomic units (OTU), used in prior  
262 URT microbiota research, and therefore may be more sensitive in detecting strain-specific  
263 differences[17]. There is one known species within the *Dolosigranulum* genus, however our  
264 findings suggest the presence of more than one strain or species, particularly given the 16S  
265 V3/V4 region as well as the wider *D. pigrum* genome has been reported to be highly  
266 conserved[16]. We did not see an inverse relationship with any of the main otopathogens,  
267 which has previously been described[18], which may be due to this population having a high  
268 baseline level of otopathogen colonisation[5]. There is growing interest in *Dolosigranulum*

269 due to its association with URT and ear health, thus the use of whole genome sequencing and  
270 ASV analysis will provide further understanding of the nuances of this nasal commensal.

271

272 *Ornithobacterium* was absent or at low relative abundance in the nasal microbiota of children  
273 with no history of OM. This is likely to represent *O. hominis*, a newly described species of

274 *Ornithobacterium*, which resides in the nasopharynx and is the only known human species in

275 that genus[7]. The role of *O. hominis* in relation to respiratory/ear disease is still

276 undetermined, however it was originally found in Australian children and Thai refugee camp

277 infants with high rates of respiratory disease[19, 20]. Our findings suggest that

278 *Ornithobacterium* may be associated with poor ear health. Furthermore, the network

279 correlations supported relationships between *Ornithobacterium*, *Helcococcus* and

280 *Dichelobacter* which may influence clinical outcomes. Intriguingly, the ASV and correlation

281 network data suggests that there may be novel bacterial species within the nasal microbial

282 ecosystem in genera which currently do not have human representatives (e.g. *Dichelobacter*,

283 *Gracilibacteria*) or only have one species (*Dolosigranulum*). Along with *Ornithobacterium*,

284 these genera warrant further investigations, particularly given their recurring relationships

285 with genera associated with health and disease.

286

287 Although this is the largest NGS-based OM study in any indigenous population to date,

288 limitations exist. Recruitment and sample collection in remote Australian communities is

289 resource and time intensive, which impacted on sample size. Furthermore, recruitment of

290 healthy children with no history of OM was challenging, despite our community-based

291 sampling, reflecting the high burden of disease in remote Indigenous Australian

292 communities[21]. We found that healthy children, with no history of OM, appeared to have

293 differences in their nasal microbiota dependent on their community of residence, however the

294 small sample size limited further sub-group analysis. A well-recognised limitation of 16S  
295 rRNA sequencing is its poor resolution at the species-level. However, a combination of ASV  
296 and culturomics data partially overcame this limitation and provided novel species-level  
297 insights into the nasal microbial ecology in nose/ear health and disease. It is hoped that  
298 moving forward methods such as metagenomic shotgun sequencing can be optimised for the  
299 URT to provide a more comprehensive assessment of the URT microbiome in relation to  
300 health and disease.

301

302 In conclusion, our investigation of the nasal microbiota of Indigenous Australian children  
303 demonstrated that there is a potential synergism between *D. pigrum* and *C.*  
304 *pseudodiphtheriticum* that is associated with ear and nose health. Our ASV-level analysis  
305 suggested that *Dolosigranulum* is a heterogeneous genus. Finally, we have detected the likely  
306 presence of *O. hominis* and suggestions of other novel species within the nasal microbiota  
307 that associate with poor URT/ ear health.

308

309

310

311

312

313 **Author's contributions:**

314 ACol, AW, EGH, JA, MB, ACer, SB designed the study. ACol and AW collected samples.

315 ACol, KC, SB conducted laboratory work. JZ and SB did the bioinformatics analysis. ACol,

316 SB, JZ wrote the manuscript. All authors revised and approved the final manuscript.

317

318 **Transparency declaration:**

319 The authors declare that they have no conflicts of interest.

320

321 Funding:

322 This work was supported by Avant Doctors in Training Research Scholarship; Queensland

323 Health Junior Doctor Fellowship; and The University of Queensland Faculty of Medicine

324 Strategic Funding.

325 Coleman received support from an Australian National Health and Medical Research Council

326 (NHMRC) Postgraduate Research Scholarship (APP1133366) and a Queensland Health

327 Junior Doctor Fellowship.

328 Cervin is supported by the University of Queensland Faculty of Medicine Strategic Funding

329 and The Garnett Passe & Rodney Williams Memorial Foundation. Bialasiewicz is supported

330 by NHMRC Program grant APP1071822 and APP1181054.

331 The funders had no role in study design, data collection, interpretation and decision to submit

332 the work for publication.

333

334 Acknowledgments:

335 We would like to acknowledge the valuable contributions of Jason Leon, Chantel Hunter,

336 Gail Wason and Deborah Gertz from Mulungu Aboriginal Corporation Medical Centre,

337 Isabel Toby from Save the Children, Doomadgee and Anne O’Keefe from Doomadgee  
338 Community Health.

339

## 340 **References**

- 341 [1] L. Monasta, L. Ronfan, F. Marchetti, M. Monico, L. Vecchi Brumatti, A. Bavcar, D.  
342 Grasso, C. Barbiero, G. Tamburlini, Burden of disease caused by otitis media: systematic  
343 review and global estimates, *PloS ONE* 7(4) (2012) e36226.
- 344 [2] K. Kong, H.L.C. Coates, Natural history, definitions, risk factors and burden of otitis  
345 media, *Med J Aust* 191(9) (2009) S39-S43.
- 346 [3] A. Coleman, A. Wood, S. Bialasiewicz, R. Ware, R. Marsh, A. Cervin, The unsolved  
347 problem of otitis media in indigenous populations: a systematic review of upper respiratory  
348 and middle ear microbiology in indigenous children with otitis media, *Microbioma* 6 (2018)  
349 199.
- 350 [4] J. Jervis-Bardy, G.B. Rogers, P.S. Morris, H.C. Smith-Vaughan, E. Nosworthy, L.E.X.  
351 Leong, R.J. Smith, L.S. Weyrich, J. De Haan, A.S. Carney, A.J. Leach, S. O’Leary, R.L.  
352 Marsh, The microbiome of otitis media with effusion in Indigenous Australian children, *Int J*  
353 *Pediatr Otorhinolaryngol* 79(9) (2015) 1548-1555.
- 354 [5] A. Coleman, S. Bialasiewicz, R. Marsh, E. Grahn Håkansson, K. Cottrell, A. Wood, N.  
355 Jayasundara, R. Ware, J. Zaugg, H. Sidjabat, J. Adams, J. Ferguson, M. Brown, K. Roos, A.  
356 Cervin, Upper respiratory microbiota in relation to ear and nose health among Australian  
357 Aboriginal and Torres Strait Islander children, *J Pediatric Infect Dis Soc* In press (2020).
- 358 [6] P. Hugenholtz, Exploring prokaryotic diversity in the genomic era, *Genome Biol* 3(2)  
359 (2002) reviews0003.1–reviews0003.8.

- 360 [7] S. Salter, P. Scott, A. Page, A. Tracey, M. de Goffau, C. Cormie, B. Ochoa-Montaño, C.  
361 Ling, J. Tangmanakit, P. Turner, J. Parkhill, 'Candidatus *Ornithobacterium hominis*': insights  
362 gained from draft genomes obtained from nasopharyngeal swabs, *Microb Genom* 5 (2019).
- 363 [8] A. Alsaleh, D. Whiley, S. Bialasiewicz, S. Lambert, R. Ware, M. Nissen, T. Sloots, K.  
364 Grimwood, Nasal swab samples and real-time polymerase chain reaction assays in  
365 community-based, longitudinal studies of respiratory viruses: the importance of sample  
366 integrity and quality control, *BMC Infect Dis* 14 (2014).
- 367 [9] S. Teo, H. Tang, D. Mok, L. Judd, S. Watts, K. Pham, B. Holt, M. Kusel, M. Serralha, N.  
368 Troy, Y. Bochkov, K. Grindle, R. Lemanske, S. Johnston, J. Gern, P. Sly, P. Holt, K. Holt,  
369 Airway microbiota dynamics uncover a critical window for interplay of pathogenic bacteria  
370 and allergy in childhood respiratory disease, *Cell Host Microbe* 24 (2018) 341-352.
- 371 [10] G. Biesbroek, E. Tsvitsivadze, E. Sanders, R. Montijn, R. Veenhoven, B.J.F. Keijer, D.  
372 Bogaert, Early respiratory microbiota composition determines bacterial succession patterns  
373 and respiratory health in children, *Am J Respir Crit Care Med* 190(11) (2014) 1283-1292.
- 374 [11] D. Janek, A. Zipperer, A. Kulik, B. Krismer, A. Peschel, High frequency and diversity of  
375 antimicrobial activities produced by nasal *Staphylococcus* strains against bacterial  
376 competitors, *PLoS Pathog* 12 (2016) e1005812.
- 377 [12] A.A.T.M. Bosch, W. de Steenhuijsen Piters, M. van Houten, M. Chu, G. Biesbroek, J.  
378 Kool, P. Pernet, P. de Groot, M. Eijkemans, B. Keijser, E. Sanders, D. Bogaert, Maturation of  
379 the infant respiratory microbiota, environmental drivers, health consequences: A prospective  
380 cohort study, *Am J Respir Crit Care Med* 196(12) (2017) 1582-1590.
- 381 [13] M. Pettigrew, A. Laufer, J. Gent, Y. Kong, K. Fennie, J. Metlay, Upper respiratory tract  
382 microbial communities, acute otitis media pathogens, and antibiotic use in healthy and sick  
383 children, *Appl Environ Microbiol* 78(17) (2012) 6262-6270.



- 384 [14] R. Lappan, K. Imbrogno, C. Sikazwe, D. Anderson, D. Mok, H.L. Coates, S.  
385 Vijayasekaran, P. Bumbak, C. Blyth, S. Jamieson, C. Peacock, A microbiome case-control  
386 study of recurrent acute otitis media identified potentially protective bacterial genera, *BMC*  
387 *Microbiol* (2018).
- 388 [15] F. Folino, M. Fattizzo, L. Ruggiero, M. Oriano, S. Aliberti, F. Blasi, M. Gaffuri, P.  
389 Marchisio, S. Torretta, Nasopharyngeal microbiota analysis in healthy and otitis-prone  
390 children, *Pediatr Infect Dis J* 40 (2021) 16-21.
- 391 [16] S. Brugger, S. Eslami, M. Pettigrew, I. Escapa, M. Henke, Y. Kong, K. Lemon,  
392 *Dolosigranulum pigrum* cooperation and competition in human nasal microbiota, *mSphere* 5  
393 (2020) e00852-20.
- 394 [17] B. Callahan, P. McMurdie, S. Holmes, Exact sequence variants should replace  
395 operational taxonomic units in marker-gene data analysis, *ISME J* 11 (2017) 2639–2643.
- 396 [18] L. Boelsen, E. Dunne, M. Mika, S. Eggers, C. Nguyen, F. Tupou Ratu, F. Russell, E.  
397 Mulholland, M. Hilty, C. Satzke, The association between pneumococcal vaccination,  
398 ethnicity, and the nasopharyngeal microbiota of children in Fiji, *Microbiome* 7 (2019) 106.
- 399 [19] R. Marsh, M. Kaestli, A. Chang, M. Binks, C. Pope, L. Hoffman, H.C. Smith-Vaughan,  
400 The microbiota in bronchoalveolar lavage from young children with chronic lung disease  
401 includes taxa present in both the oropharynx and nasopharynx, *Microbiome* 4 (2016) 37.
- 402 [20] S. Salter, C. Turner, W. Watthanaworawit, M. de Goffau, J. Wagner, J. Parkhill, S.  
403 Bentley, D. Goldblatt, F. Nosten, P. Turner, A longitudinal study of the infant  
404 nasopharyngeal microbiota: The effects of age, illness and antibiotic use in a cohort of South  
405 East Asian children, *PloS Negl Trop Dis* 11 (2017) e0005975.
- 406 [21] P. Morris, A.J. Leach, P. Silberberg, G. Mellon, C. Wilson, E. Hamilton, J. Beissbarth,  
407 Otitis media in young Aboriginal children from remote communities in Northern and Central  
408 Australia: a cross-sectional survey, *BMC Pediatr* 5 (2005) 27.

- 409 [22] The Australian Technical Advisory Group of Immunisation, The Australian  
410 immunisation handbook, Australian Government Department of Health, Canberra, 2017.  
411

412 *Table 1: Demographic and clinical details of participants*

| Characteristic <sup>a</sup>           | Remote<br>Community<br>(n = 59) | Rural<br>Community<br>(n = 44) | Difference between remote<br>and rural<br>(p-value) |
|---------------------------------------|---------------------------------|--------------------------------|-----------------------------------------------------|
| Female gender                         | 33 (47.7)                       | 21 (47.7)                      | 0.41                                                |
| Age in months, mean (SD)              | 57.0 (13.4)                     | 55.4 (18.6)                    | 0.61                                                |
| Educational attendance                |                                 |                                | <0.001                                              |
| School                                | 5 (8.5)                         | 14 (31.8)                      |                                                     |
| Pre-school                            | 43 (72.9)                       | 11 (25.0)                      |                                                     |
| Daycare                               | 5 (8.5)                         | 18 (40.9)                      |                                                     |
| Home                                  | 6 (10.2)                        | 1 (2.3)                        |                                                     |
| No. people in the home, mean (SD)     | 5.8 (2.2)                       | 4.9 (1.6)                      | 0.04                                                |
| Pneumococcal vaccination <sup>b</sup> | 56 (94.9)                       | 37 (84.1)                      | 0.04                                                |
| No. children with a history of OM     | 51 (86.4)                       | 25 (56.8)                      | <0.001                                              |
| Never OM                              | 5 (8.5)                         | 12 (27.3)                      | 0.01                                                |
| Historical type of OM                 |                                 |                                | 0.07                                                |
| AOM                                   | 25 (42.4)                       | 18 (40.9)                      |                                                     |
| AOM with perforation                  | 6 (10.2)                        | 2 (8.0)                        |                                                     |
| OME                                   | 3 (5.1)                         | 1 (4.0)                        |                                                     |
| CSOM                                  | 14 (23.7)                       | 1 (4.0)                        |                                                     |
| Unknown                               | 3 (5.1)                         | 3 (12.0)                       |                                                     |
| Otoscopy at sampling                  |                                 |                                | 0.24                                                |
| Bilateral normal TM                   | 26 (44.1)                       | 29 (65.9)                      |                                                     |
| Effusion                              | 13 (22.3)                       | 5 (11.4)                       |                                                     |
| AOM                                   | 2 (3.4)                         | 2 (4.5)                        |                                                     |
| Perforation                           | 5 (8.5)                         | 2 (4.5)                        |                                                     |

|                             |           |           |      |
|-----------------------------|-----------|-----------|------|
| Unable to visualize TM      | 13 (22.0) | 6 (13.6)  |      |
| Nasal discharge at sampling |           |           | 0.01 |
| Nil                         | 30 (50.8) | 35 (79.5) |      |
| Serous                      | 10 (16.9) | 3 (6.8)   |      |
| Purulent                    | 19 (32.2) | 6 (13.6)  |      |
| Oropharynx at sampling      |           |           | 0.73 |
| Tonsillitis                 | 0         | 0         |      |
| Pharyngitis                 | 2 (3.4)   | 1 (2.3)   |      |
| Season of collection        |           |           | 0.01 |
| Winter                      | 7 (11.9)  | 0         |      |
| Spring                      | 29 (49.2) | 16 (36.4) |      |
| Summer                      | 0         | 0         |      |
| Autumn                      | 23 (38.9) | 28 (63.6) |      |

413

414 Note: <sup>a</sup> The data indicate number (percentage), aside from Age which represent mean  
 415 (standard deviation (SD)); <sup>b</sup> as per the Australian Vaccination Schedule[22]; AOM, acute  
 416 otitis media; CSOM, chronic suppurative otitis media; OM, otitis media; OME, otitis media  
 417 with effusion; TM, tympanic membrane.

418

419 Figure 1: Mean relative microbial abundances of the 20 most abundant genera (or lowest  
420 resolved taxonomy level) across all samples illustrating differences between otitis Status,  
421 community of residence and other key variables. Microbes with lower abundances have been  
422 combined in the 'Other' (in grey). To improve interpretability, samples have been ordered by  
423 Otitis status, Community and *Dolosigranulum* abundance.

424 Note: OM = otitis media, HxOM = History of OM, but health tympanic membrane at time of  
425 collection.

426

427 Figure 2: Network correlation analysis showing differences in genera relationships in context  
428 of otitis status: A) Never OM; B): HxOM; C) Middle ear effusion; D) TM perforation.

429 Note: OM = otitis media, HxOM = History of OM, but health tympanic membrane at time of  
430 collection.

431

432 Figure 3: Correlation network analysis of genera in relation to nose health showing  
433 differential *Dolosigranulum* relationships.

434

435 Figure 4: Genus-level Principal Component Analysis showing no separation in relation to A)  
436 otitis status; B) community of residence; C) season of swab collection; D) number of people  
437 residing within the household.

438 Note: OM = otitis media, HxOM = History of OM, but healthy tympanic membrane at time  
439 of collection.

440

441

442

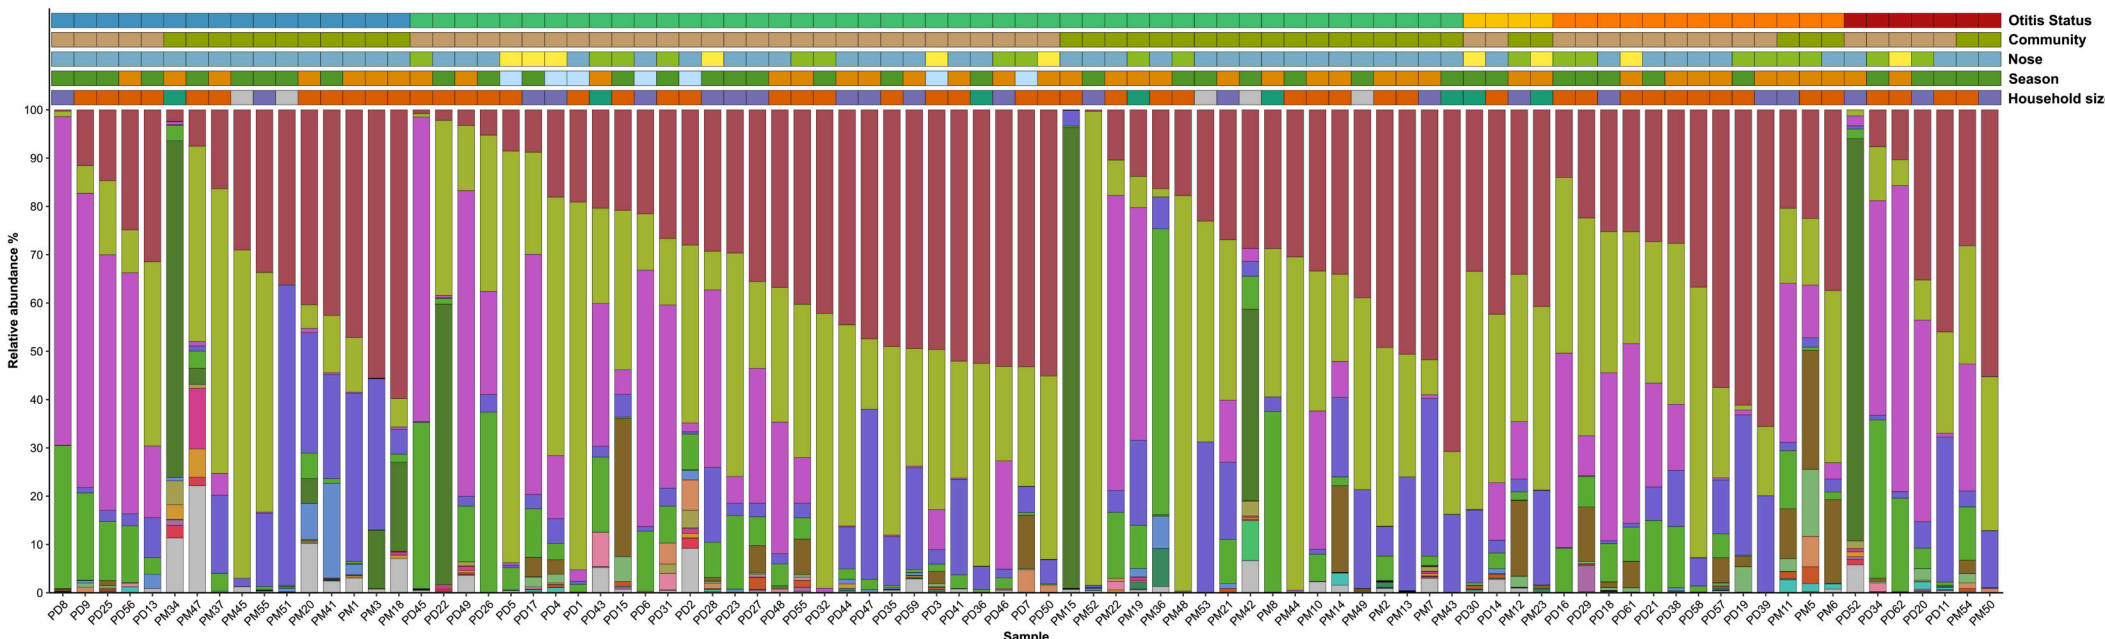

**Genus (or lowest resolved taxonomy level)**

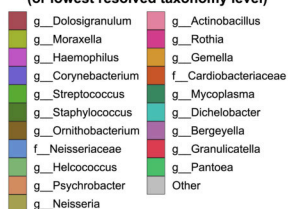

**Nose**

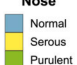

**Community**

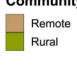

**Household size**

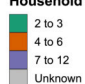

**Season**

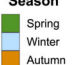

**Otitis Status**

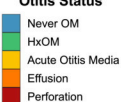

**A****A. Never OM**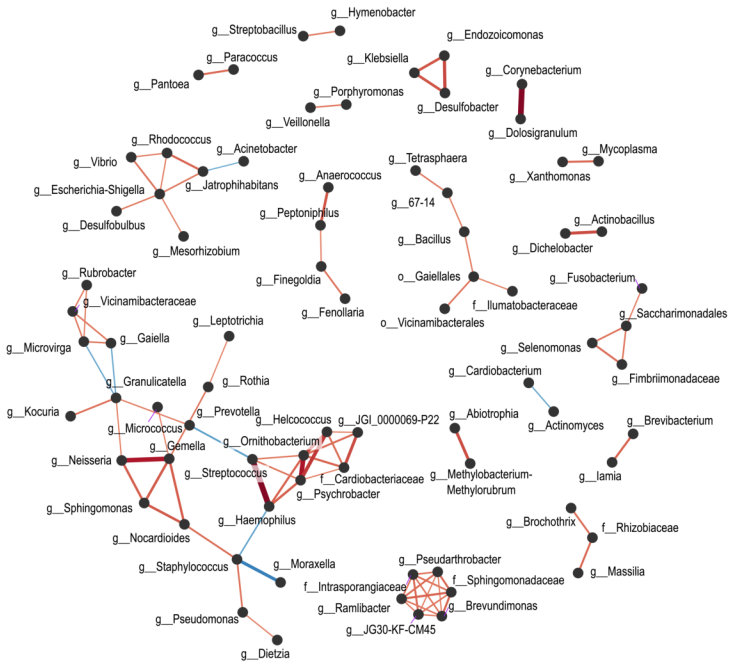**B****B. HxOM**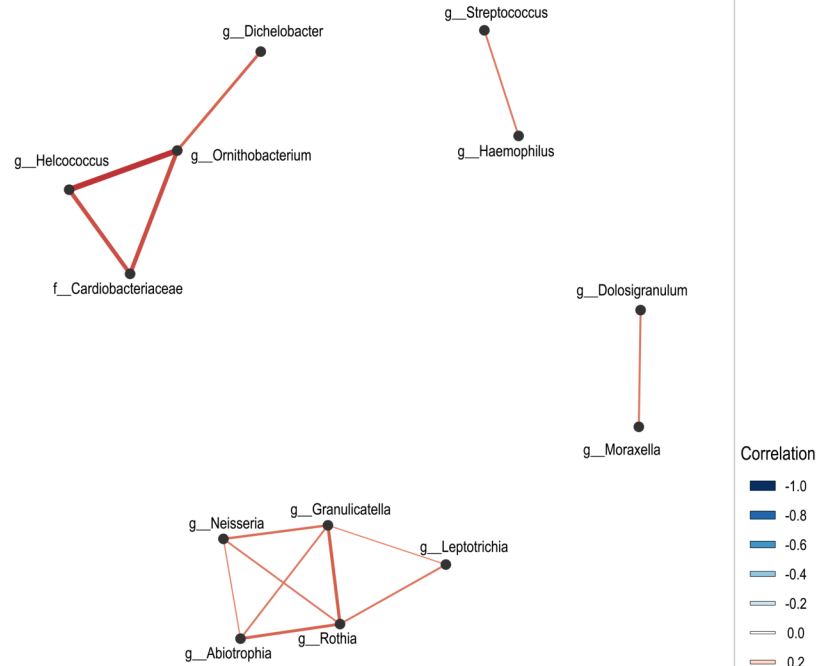**C****C. Effusion**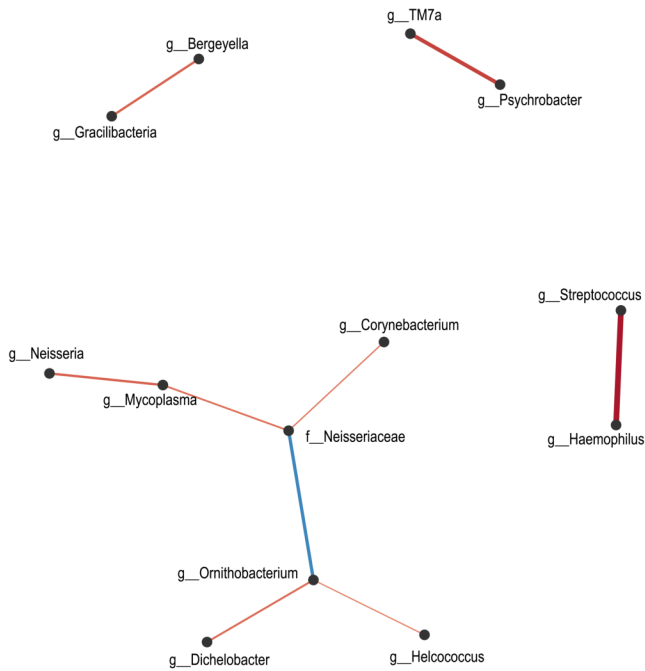**D****D. Perforation**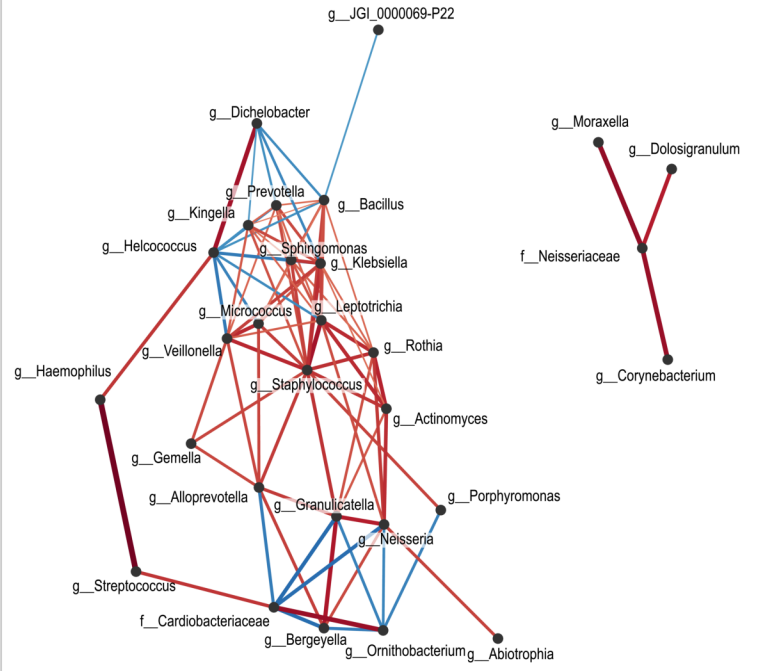

Correlation

-1.0

-0.8

-0.6

-0.4

-0.2

0.0

0.2

0.4

0.6

0.8

1.0

### A. Normal nose

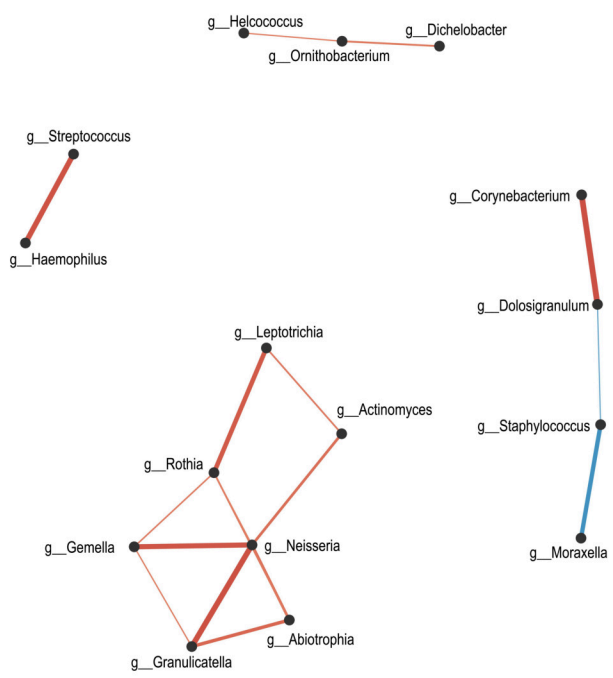

### B. Serrous rhinorrhea

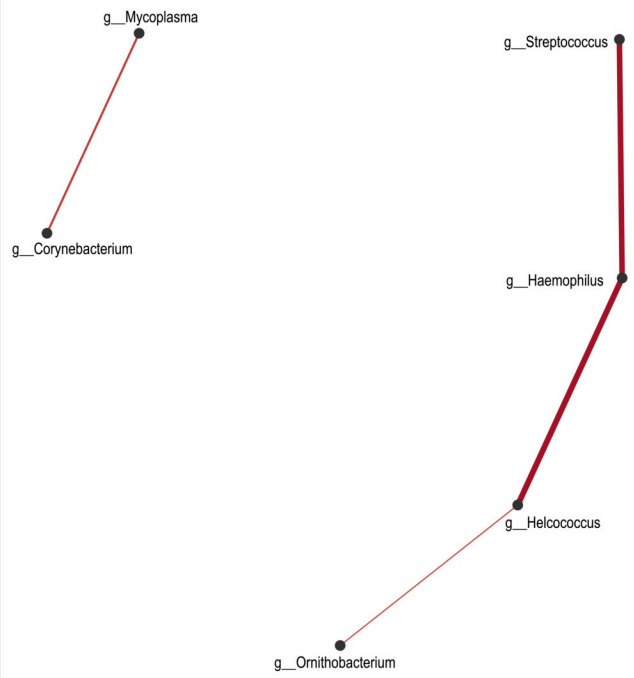

### C. Purulent rhinorrhea

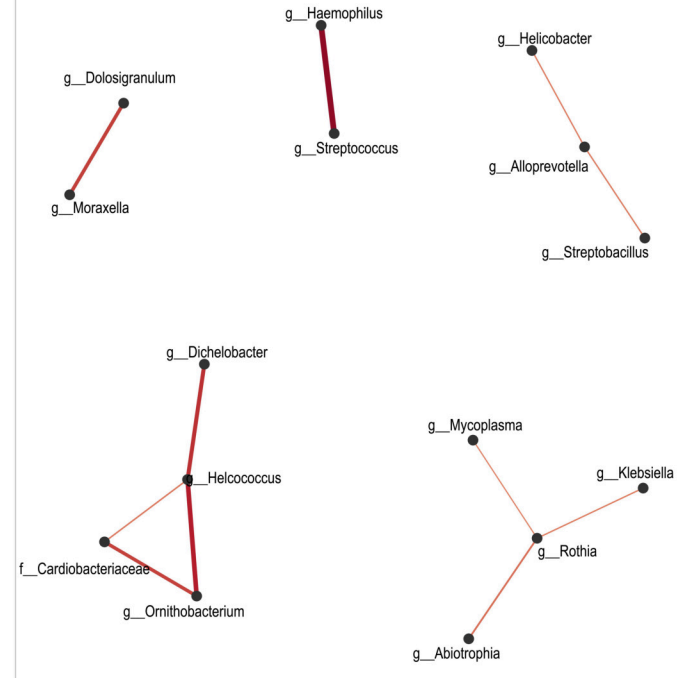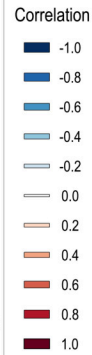



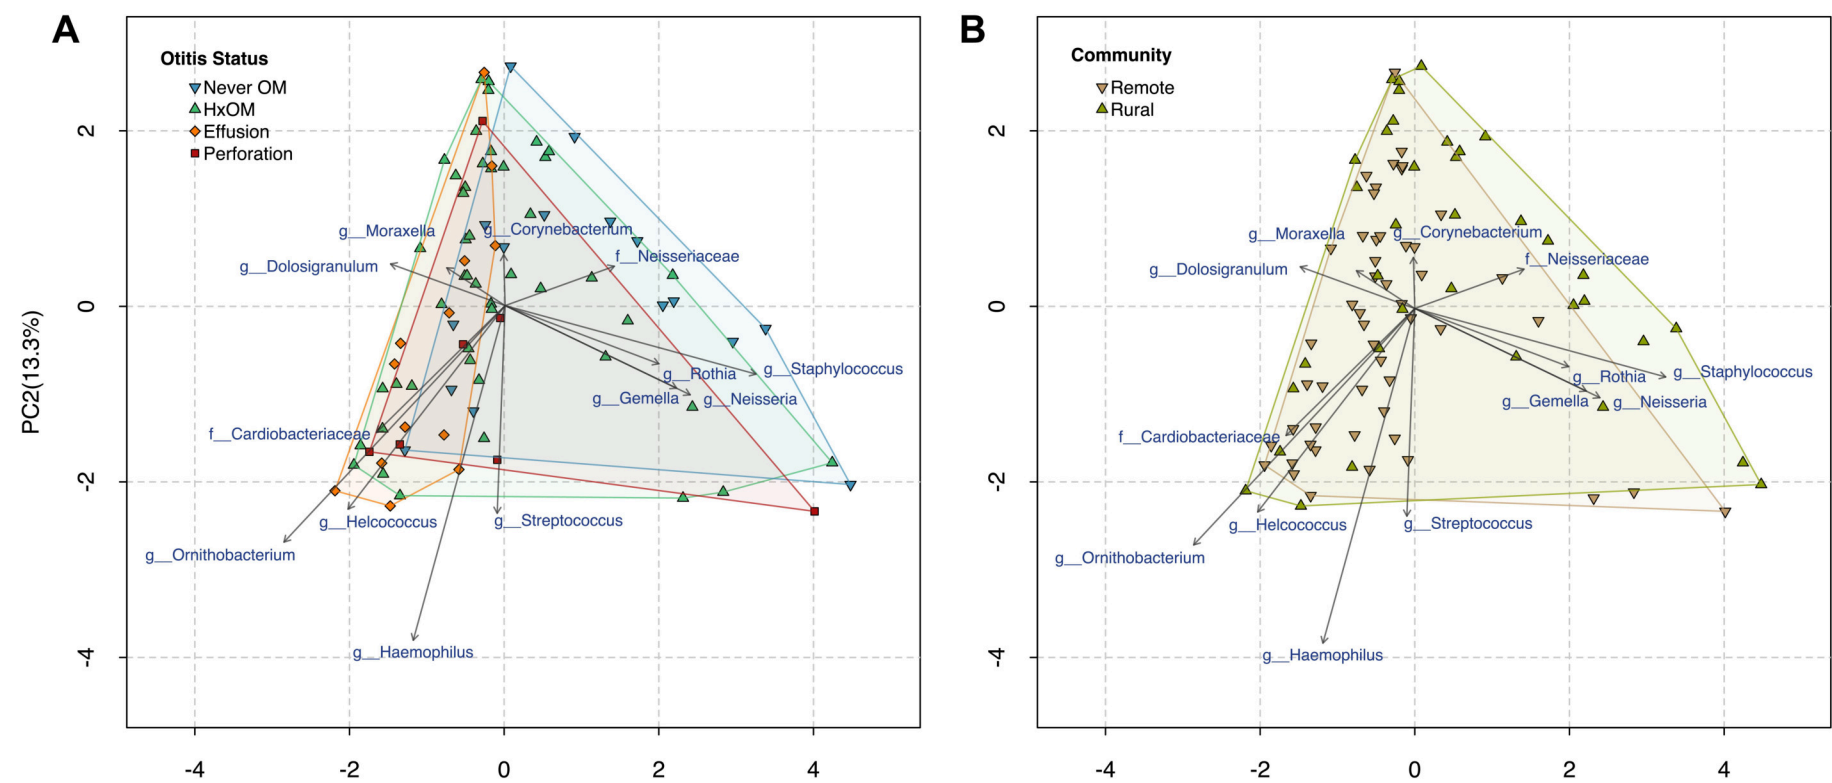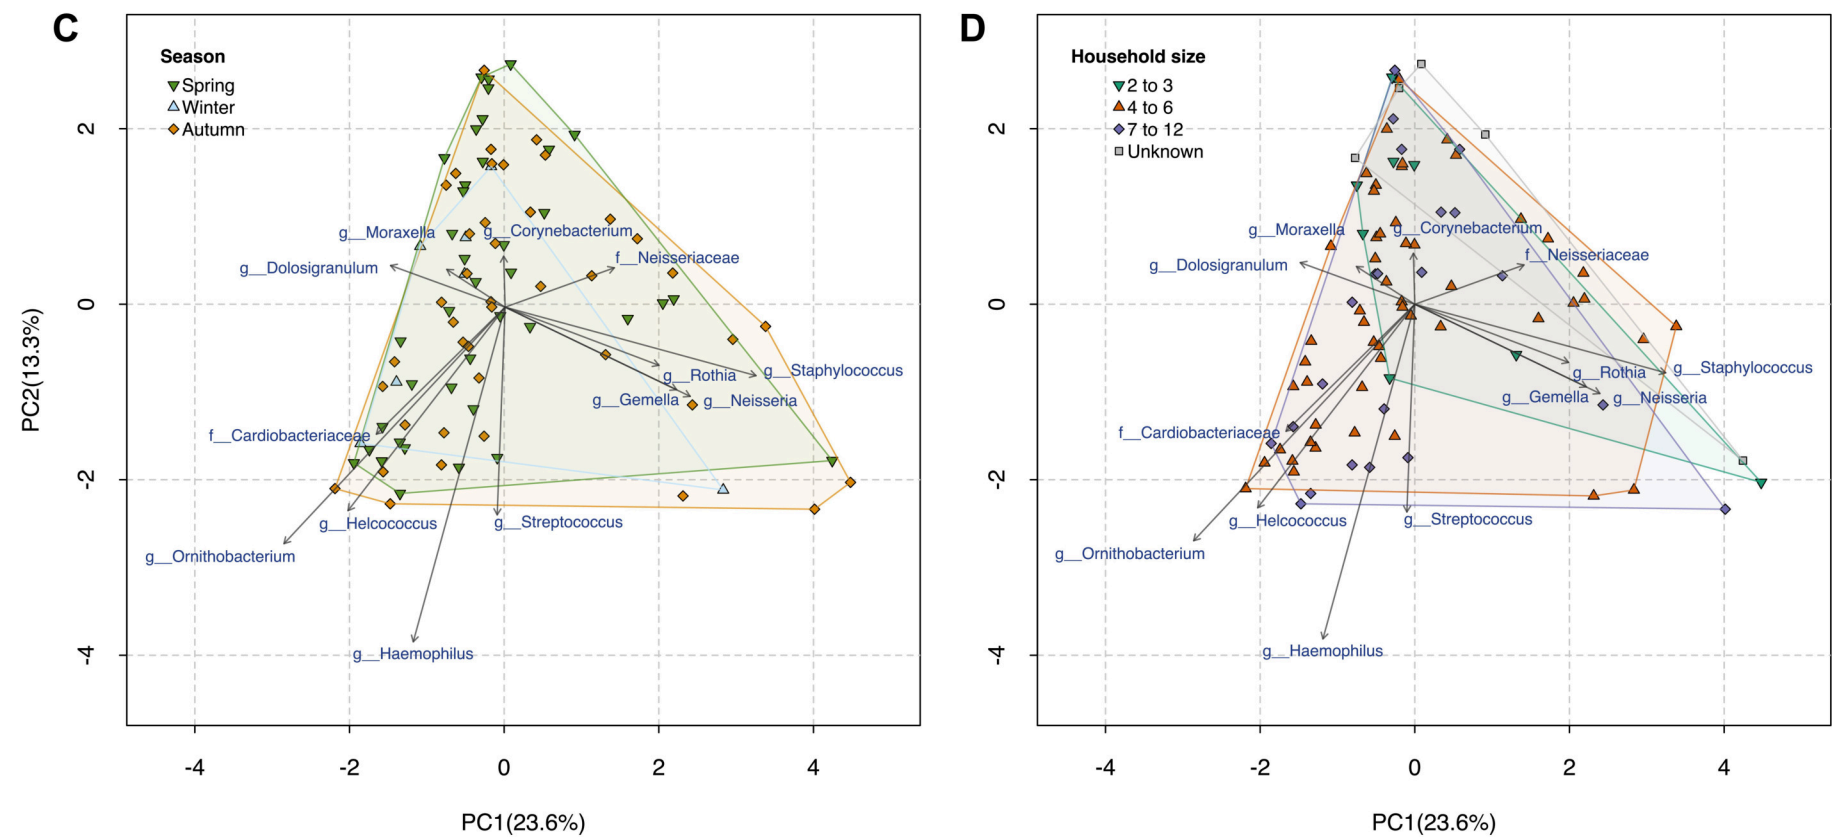

Source: https://biorxiv.org/content/10.1101/2021.05.13.444113v1.full.pdf
